# Supplementary material for: Stimulator of interferon response cGAMP interactor overcomes ERBB2-mediated apatinib resistance in head and neck squamous cell carcinoma
Source: publisher site journal article supplement (doi:10.18632/aging.203475), 2021-08-30
Supplement: Supplementary file [file aging-v13i16-203475-supplementary-material-SD1.pdf]

## SUPPLEMENTARY FIGURE

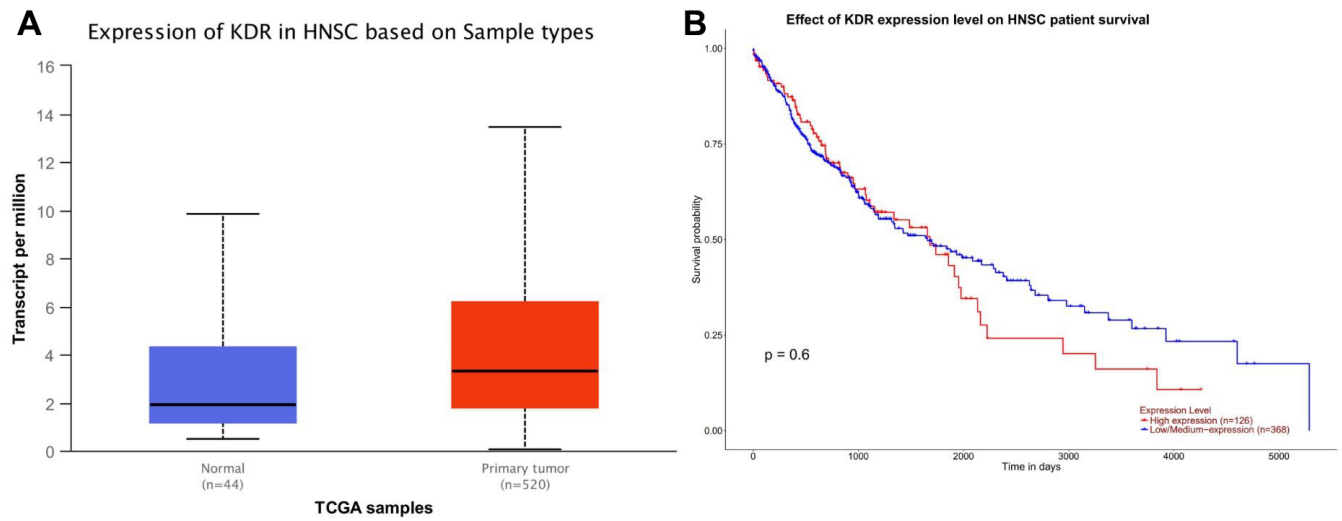

**Supplementary Figure 1.** (A) Compared with the normal group (blue), the expression of VEGFR2 was high in tumor samples (red); (B) Survival curves of VEGFR2 expression for prognosis in the TCGA-HNSC dataset. Red represents the high expression group and blue represents the low expression group.
